# Supplementary material for: Identifying the Optimal Exercise Prescription for Patients with Coronary Artery Disease Undergoing Cardiac Rehabilitation: Protocol for a Systematic Review and Network Meta-Analysis of Randomized Control Trials
Source: MDPI journal article supplement (doi:10.3390/ijerph191912317), 2022-09-28
Supplement: s1 [file s1]

**Table S1. Search strategy for individual databases**

**CINAHL**

|     |                                                                            |
|-----|----------------------------------------------------------------------------|
| #1  | Aerobic exercise                                                           |
| #2  | Aerobic training                                                           |
| #3  | Resistance training                                                        |
| #4  | Strength training                                                          |
| #5  | Weight training                                                            |
| #6  | HIIT                                                                       |
| #7  | High intensity training                                                    |
| #8  | High intensity interval training                                           |
| #9  | Inspiratory muscle training                                                |
| #10 | Respiratory muscle training                                                |
| #11 | Respiratory muscle strength training                                       |
| #12 | Cardiac rehabilitation                                                     |
| #13 | #1 OR #2 OR #3 OR #4 OR #5 OR #6 OR #7<br>OR #8 OR #9 OR #10 OR #11 OR #12 |
| #14 | Coronary artery disease                                                    |

|      |                                                                       |
|------|-----------------------------------------------------------------------|
| #15  | CAD                                                                   |
| #16  | Coronary heart disease                                                |
| #17  | CHD                                                                   |
| #18  | Ischemic heart disease                                                |
| #19  | Ischaemic heart disease                                               |
| #20  | Coronary artery bypass graft                                          |
| #21  | CABG                                                                  |
| #22  | PCI                                                                   |
| #23  | Percutaneous coronary intervention                                    |
| #24  | #14 OR #15 OR #16 OR #17 OR #18 OR #19<br>OR #20 OR #21 OR #22 OR #23 |
| # 25 | #13 AND #24                                                           |

## EMBASE

|    |                     |
|----|---------------------|
| #1 | Aerobic exercise    |
| #2 | Aerobic training    |
| #3 | Resistance training |
| #4 | Strength training   |

|     |                                                                            |
|-----|----------------------------------------------------------------------------|
| #5  | Weight training                                                            |
| #6  | HIIT                                                                       |
| #7  | High intensity training                                                    |
| #8  | High intensity interval training                                           |
| #9  | Inspiratory muscle training                                                |
| #10 | Respiratory muscle training                                                |
| #11 | Respiratory muscle strength training                                       |
| #12 | Cardiac rehabilitation                                                     |
| #13 | #1 OR #2 OR #3 OR #4 OR #5 OR #6 OR #7<br>OR #8 OR #9 OR #10 OR #11 OR #12 |
| #14 | Coronary artery disease                                                    |
| #15 | CAD                                                                        |
| #16 | Coronary heart disease                                                     |
| #17 | CHD                                                                        |
| #18 | Ischemic heart disease                                                     |
| #19 | Ischaemic heart disease                                                    |
| #20 | Coronary artery bypass graft                                               |
| #21 | CABG                                                                       |

|      |                                                                       |
|------|-----------------------------------------------------------------------|
| #22  | PCI                                                                   |
| #23  | Percutaneous coronary intervention                                    |
| #24  | #14 OR #15 OR #16 OR #17 OR #18 OR #19<br>OR #20 OR #21 OR #22 OR #23 |
| # 25 | #13 AND #24                                                           |

### Web of Science

|     |                                      |
|-----|--------------------------------------|
| #1  | Aerobic exercise                     |
| #2  | Aerobic training                     |
| #3  | Resistance training                  |
| #4  | Strength training                    |
| #5  | Weight training                      |
| #6  | HIIT                                 |
| #7  | High intensity training              |
| #8  | High intensity interval training     |
| #9  | Inspiratory muscle training          |
| #10 | Respiratory muscle training          |
| #11 | Respiratory muscle strength training |

|      |                                                                            |
|------|----------------------------------------------------------------------------|
| #12  | Cardiac rehabilitation                                                     |
| #13  | #1 OR #2 OR #3 OR #4 OR #5 OR #6 OR #7<br>OR #8 OR #9 OR #10 OR #11 OR #12 |
| #14  | Coronary artery disease                                                    |
| #15  | CAD                                                                        |
| #16  | Coronary heart disease                                                     |
| #17  | CHD                                                                        |
| #18  | Ischemic heart disease                                                     |
| #19  | Ischaemic heart disease                                                    |
| #20  | Coronary artery bypass graft                                               |
| #21  | CABG                                                                       |
| #22  | PCI                                                                        |
| #23  | Percutaneous coronary intervention                                         |
| #24  | #14 OR #15 OR #16 OR #17 OR #18 OR #19<br>OR #20 OR #21 OR #22 OR #23      |
| # 25 | #13 AND #24                                                                |
